# Supplementary material for: Infant Emergency Department Visits, Readmission, and Mortality by Maternal Anxiety Disorder during Pregnancy Occurring with and without Other Mental Health Conditions: A Retrospective Cohort Study
Source: Research Square preprint supplement (doi:10.21203/rs.3.rs-7687467/v1), 2025-10-12
Supplement: Supplementary file 2 [file 2906ee1fd0ab7a633bacea73.docx]

Appendix 1. International Classification of Diseases codes and indication of birth certificate ascertainment for included variables

|  | ICD-9 | ICD-10 | Birth certificate |
| --- | --- | --- | --- |
| Maternal variables |  |  |  |
| Anxiety | 300 | F4 |  |
| Depression | 296.2, 296.3, 311 | F32.0, F32.1, F32.2, F32.3, F32.8, F32.9, F33.0, F33.1, F33.2, F33.3, F33.4, F33.8, F33.9 |  |
| Other mental health diagnosis | 295, 296.0, 296.1, 296.4, 296.5, 296.6, 296.7, 296.8, 296.9, 297, 298, 299, 301, 302 | F2, F30, F31, F34, F38, F39, F4, F5, F6 |  |
| Gestational diabetes | 648.8, infant 775.0 | O24.4, infant P70.0 | X |
| Preexisting diabetes | 249, 250, 648.0, infant P70.1 | E10, E11, E12, E13, E14,O24.0, O24.1, O24.2, O24.3 | X |
| Gestational hypertension | 642.3, Infant 760.0 | O13, infant P00.0 | X |
| Preexisting hypertension | 642.0, 642.1, 642.2 | O10 | X |
| Smoking | 305.1, 649.0 | F17, O99.33 | X |
| Drug/alcohol use | 303, 304, 305.0, 305.2, 305.3, 305.4, 305.5, 305.6, 305.7, 305.8, 305.9, 648.3 | F10, F11, F12, F13, F14, F15, F16, F18, F19, O99.32 |  |
| Final causes of death (note: cause of death only reported as ICD-10) |  |  |  |
| Perinatal cause |  | P |  |
| Sudden unexpected infant death |  | R95, R99, W75 |  |
| Non-accidental trauma |  | T74, T76, X9, Y0 |  |
| Birth defect/chromosomal abnormality |  | Q |  |
